# Supplementary material for: Investigating the Influence of Diverse Functionalized Carbon Nanotubes as Conductive Fibers on Paper-Based Sulfur Cathodes in Lithium–Sulfur Batteries
Source: MDPI journal article supplement (doi:10.3390/nano14060484), 2024-03-07
Supplement: s1 [file s1]

## ***Supporting Information***

### **Investigating the Influence of Diverse Functionalized Carbon Nanotubes as Conductive Fibers on Paper-Based Sulfur Cathodes in Lithium-Sulfur Batteries**

*Xuan Ren, Haiwei Wu\*, Ya Xiao, Haoteng Wu, Huan Wang, Haiwen Li,*

*Yuchen Guo, Peng Xu, Baohong Yang\*, Chuanyin Xiong*

Shaanxi Provincial Key Laboratory of Papermaking Technology and Specialty Paper Development, College of Bioresources Chemical and Materials Engineering, Shaanxi University of Science & Technology, Xi'an, China (710021)

*Dr. Haiwei Wu, Email: [haiweiwufly@163.com](mailto:haiweiwufly@163.com), [wuhaiwei@sust.edu.cn](mailto:wuhaiwei@sust.edu.cn)*

*Dr. Baohong Yang, Email: [yangbaohong@sust.edu.cn](mailto:yangbaohong@sust.edu.cn)*

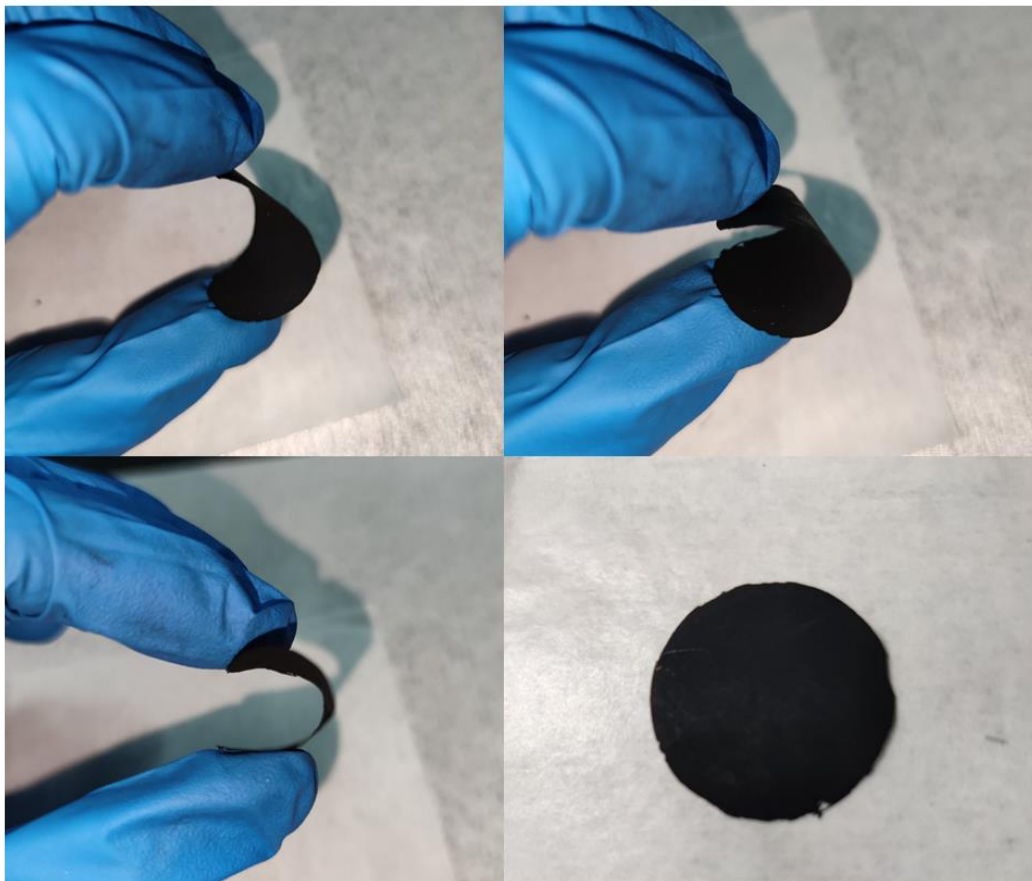

**Figure S1** Flexible paper-based sulfur cathode prepared by papermaking process.

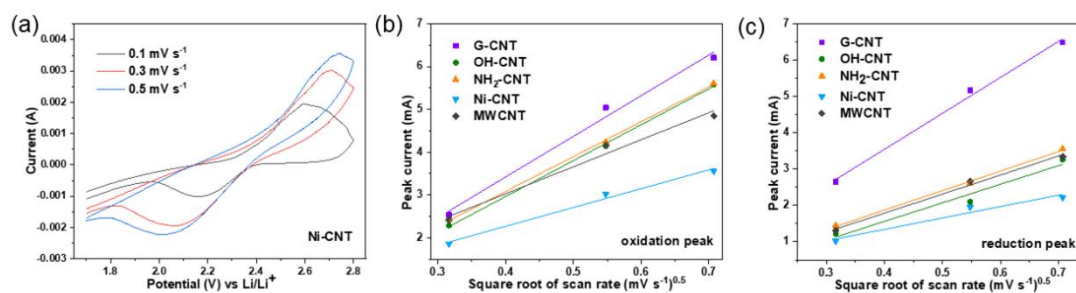

**Figure S2** CV curves of Li-S cells assembled by (a) Ni-CNT paper-based electrode at scan rates of 0.1 to 0.5 mV s<sup>-1</sup>. Fitted curves of peak current versus square root of scan rates for (b) oxidation and (c) reduction peaks.
